# Supplementary material for: Prescription of Aminoglycosides in 23 French Neonatal Intensive Care Units
Source: MDPI journal article supplement (doi:10.3390/antibiotics10111422), 2021-11-20
Supplement: s1 [file s1]

Supplementary Materials:

**Table S1.** Unit daily doses of gentamicin and amikacin according to the literature

| Source                                   | GA*<br>(weeks) | PMA*<br>(weeks) | PNA*<br>(days) | Weight<br>(kg) | Recommendations          | Minimum<br>unit daily<br>dose (mg/kg) | Maximum<br>unit daily<br>dose (mg/kg) |
|------------------------------------------|----------------|-----------------|----------------|----------------|--------------------------|---------------------------------------|---------------------------------------|
| <b>Gentamicin</b>                        |                |                 |                |                |                          |                                       |                                       |
| Handbook<br>(Bradley et<br>Redbook 2021) | < 30           |                 | ≤ 14           |                | 5mg/kg/dose every 48h    | 2,5                                   | 2,5                                   |
|                                          | < 30           |                 | ≥ 15           |                | 5mg/kg/dose every 36h    | 3,333                                 | 3,333                                 |
|                                          | 30-34          |                 | ≤ 10           |                | 5mg/kg/dose every 36h    | 3,333                                 | 3,333                                 |
|                                          | 30-34          |                 | 11-60          |                | 5mg/kg/dose every 24h    | 5                                     | 5                                     |
|                                          | ≥ 35           |                 | ≤ 7            |                | 4mg/kg/dose every 24h    | 4                                     | 4                                     |
|                                          | ≥ 35           |                 | 8-60           |                | 5mg/kg/dose every 24h    | 5                                     | 5                                     |
| Handbook<br>(Bradley 2015)               | < 32           |                 | ≤ 14           |                | 5mg/kg/dose every 48h    | 2,5                                   | 2,5                                   |
|                                          | < 32           |                 | ≥ 15           |                | 5mg/kg/dose every 36h    | 3,333                                 | 3,333                                 |
|                                          | 32-36          |                 | ≤ 7            |                | 4mg/kg/dose every 36h    | 2,667                                 | 2,667                                 |
|                                          | 32-36          |                 | 8-60           |                | 4mg/kg/dose every 24h    | 4                                     | 4                                     |
|                                          | ≥ 37           |                 | ≤ 28           |                | 4mg/kg/dose every 24h    | 4                                     | 4                                     |
| Handbook<br>(Redbook 2015)               |                |                 | ≤ 14           | < 1            | 5mg/kg/dose every 48h    | 2,5                                   | 2,5                                   |
|                                          |                |                 | 15-28          | < 1            | 5mg/kg/dose every 36h    | 3,333                                 | 3,333                                 |
|                                          |                |                 | ≤ 7            | 1-2            | 5mg/kg/dose every 48h    | 2,5                                   | 2,5                                   |
|                                          |                |                 | 8-28           | 1-2            | 5mg/kg/dose every 36h    | 3,333                                 | 3,333                                 |
|                                          |                |                 | ≤ 7            | > 2            | 4mg/kg/dose every 24h    | 4                                     | 4                                     |
|                                          |                |                 | 8-28           | > 2            | 4-5mg/kg/dose every 24h  | 4                                     | 5                                     |
| ANSM (Afssaps)                           |                | < 30            |                |                | 7 mg/kg every 48h        | 3,5                                   | 3,5                                   |
|                                          |                | 30-33           |                |                | 6,5 mg/kg every 36h      | 4,333                                 | 4,333                                 |
|                                          |                | 34-36           |                |                | 6 mg/kg every 24-36h     | 4                                     | 6                                     |
|                                          |                | ≥ 37            |                |                | 5,5 mg/kg every 24h      | 5,5                                   | 5,5                                   |
| SFN                                      | 34 - 36        |                 |                |                | 6mg/kg/24h               | 6                                     | 6                                     |
|                                          | ≥ 37           |                 |                |                | 5mg/kg/24h               | 5                                     | 5                                     |
| BNFc                                     | ≥ 37           |                 | <7             |                | 5 mg/kg every 36h        | 3,333                                 | 3,333                                 |
|                                          | ≥ 37           |                 | 7-28           |                | 5 mg/kg every 24h        | 5                                     | 5                                     |
| <b>Amikacin</b>                          |                |                 |                |                |                          |                                       |                                       |
| Handbook<br>(Bradley 2016)               | < 30           |                 | <14            |                | 15mg/kg/dose every 48h   | 7,5                                   | 7,5                                   |
|                                          | < 30           |                 | ≥15            |                | 15mg/kg/dose every 36h   | 10                                    | 10                                    |
|                                          | 30-34          |                 | ≤ 60           |                | 15mg/kg/dose every 24h   | 15                                    | 15                                    |
|                                          | ≥35            |                 | ≤7             |                | 15mg/kg/dose every 24h   | 15                                    | 15                                    |
|                                          | ≥35            |                 | ≥8             |                | 17,5mg/kg/dose every 24h | 17,5                                  | 17,5                                  |
| Handbook<br>(Redbook 2015-<br>2021)      |                |                 | ≤14            | <1             | 15 mg/kg/dose every 48h  | 7,5                                   | 7,5                                   |
|                                          |                |                 | 15-28          | <1             | 15 mg/kg/dose every 24h  | 15                                    | 15                                    |
|                                          |                |                 | ≤7             | 1-2            | 15 mg/kg/dose every 48h  | 7,5                                   | 7,5                                   |

| Source                              | GA*<br>(weeks) | PMA*<br>(weeks) | PNA*<br>(days) | Weight<br>(kg) | Recommendations                                                                                    | Minimum<br>unit daily<br>dose (mg/kg) | Maximum<br>unit daily<br>dose (mg/kg) |
|-------------------------------------|----------------|-----------------|----------------|----------------|----------------------------------------------------------------------------------------------------|---------------------------------------|---------------------------------------|
| Handbook<br>(multiples<br>articles) | ≤ 27           |                 | 8-28           | 1-2            | 15 mg/kg/dose every 24h                                                                            | 15                                    | 15                                    |
|                                     |                |                 | ≤7             | >2             | 15 mg/kg/dose every 24h                                                                            | 15                                    | 15                                    |
|                                     |                |                 | 8-28           | >2             | 17,5 mg/kg/dose every 24h                                                                          | 17,5                                  | 17,5                                  |
|                                     |                |                 |                |                | 15-20mg/kg/dose every 48h                                                                          | 7,5                                   | 10                                    |
|                                     |                |                 |                |                | 15-20mg/kg/dose every 36h                                                                          | 10                                    | 13,333                                |
| Handbook<br>(Redbook 2012)          |                |                 | ≥34            |                | 15-20mg/kg/dose every 24h                                                                          | 15                                    | 20                                    |
|                                     |                |                 | ≤14            | <1             | 15 mg/kg/dose every 48h                                                                            | 7,5                                   | 7,5                                   |
|                                     |                |                 | 15-28          | <1             | 15 mg/kg/dose every 24-48h                                                                         | 7,5                                   | 15                                    |
|                                     |                |                 | ≤7             | 1-2            | 15 mg/kg/dose every 48h                                                                            | 7,5                                   | 7,5                                   |
|                                     |                |                 | 8-28           | 1-2            | 15 mg/kg/dose every 24-48h                                                                         | 7,5                                   | 15                                    |
| Handbook                            |                |                 | ≤7             | >2             | 15 mg/kg/dose every 24h                                                                            | 15                                    | 15                                    |
|                                     |                |                 | 8-28           | >2             | 15 mg/kg/dose every 12-24h                                                                         | 15                                    | 30                                    |
|                                     |                |                 | ≤7             | ≥2             | 15-20 mg/kg/day divided<br>every 12h                                                               | 15                                    | 20                                    |
|                                     |                |                 | > 7            | ≥2             | 30 mg/kg/day divided every<br>8h                                                                   | 30                                    | 30                                    |
|                                     |                |                 |                |                |                                                                                                    |                                       |                                       |
| ANSM (Afssaps)                      |                |                 | < 30           |                | 35 mg/kg every 60h                                                                                 | 14                                    | 14                                    |
|                                     |                |                 | 30-33          |                | 32,5 mg/kg every 48h                                                                               | 16,25                                 | 16,25                                 |
|                                     |                |                 | 34-36          |                | 30 mg/kg toutes 36h                                                                                | 20                                    | 20                                    |
|                                     |                |                 | ≥ 37           |                | 27,5 mg/kg every 24 à 36h                                                                          | 18,333                                | 27,5                                  |
| BNFc                                | ≥ 37           |                 |                |                | 15 mg/kg every 24 hours,<br>intravenous injection to be<br>administered over 3–5<br>minutes        | 15                                    | 15                                    |
|                                     |                |                 |                |                | Loading dose 10 mg/kg                                                                              | 10                                    | 10                                    |
|                                     |                |                 |                |                | then 7.5 mg/kg every 12<br>hours, intravenous injection<br>to be administered over 3–5<br>minutes. | 15                                    | 15                                    |

\* GA, gestational age; PMA, postmenstrual age; PNA, postnatal age.

**Table S2.** Distribution of time intervals between amikacin doses in 680 extremely preterm infants (22-26 weeks) according to postnatal age at first prescription

|                              | Postnatal age at first prescription |                   |                  |                  |
|------------------------------|-------------------------------------|-------------------|------------------|------------------|
|                              | 1st week<br>n=449                   | 2nd week<br>n=126 | 3rd week<br>n=69 | 4th week<br>n=36 |
| <b>Time Intervals, n (%)</b> |                                     |                   |                  |                  |
| 24 h                         | 1 (0.2)                             | 1 (0.8)           | 2 (2.9)          | 5 (13.9)         |
| 30 h                         | 0 (0.0)                             | 0 (0.0)           | 0 (0.0)          | 0 (0.0)          |
| 36 h                         | 2 (0.4)                             | 12 (9.5)          | 26 (37.7)        | 22 (61.1)        |
| 48 h                         | 397 (88.4)                          | 90 (71.4)         | 19 (27.5)        | 2 (5.6)          |
| 60 h                         | 46 (10.2)                           | 19 (15.1)         | 19 (27.5)        | 7 (19.4)         |

**Table S3.** Distribution of time intervals between amikacin doses in 1366 very preterm infants (27-31 weeks) according to postnatal age at first prescription

|                              | Postnatal age at first prescription |                   |                  |                  |
|------------------------------|-------------------------------------|-------------------|------------------|------------------|
|                              | 1st week<br>n=1,027                 | 2nd week<br>n=206 | 3rd week<br>n=83 | 4th week<br>n=50 |
| <b>Time Intervals, n (%)</b> |                                     |                   |                  |                  |
| 24 h                         | 16 (1.6)                            | 10 (4.9)          | 9 (10.8)         | 9 (18.0)         |
| 30 h                         | 37 (3.6)                            | 9 (4.4)           | 5 (6.0)          | 1 (2.0)          |
| 36 h                         | 239 (23.3)                          | 123 (59.7)        | 46 (55.4)        | 30 (60.0)        |
| 48 h                         | 712 (69.3)                          | 54 (26.2)         | 22 (26.5)        | 10 (20.0)        |
| 60 h                         | 21 (2.0)                            | 8 (3.9)           | 1 (1.2)          | 0 (0.0)          |
